# Supplementary material
Source: publisher figshare collection journal article supplement (https://tandf.figshare.com/ndownloader/files/22514741)
Supplement: Supplementary file 1 [file 22514741]

Supplemental Table 1. Quantitative Real-Time MMP qRT-PCR primers.

| **Gene** | **Primer Sequence*** |
| --- | --- |
| MMP-1 | F: 5’-GACAGAAAGAGACAGGAGAC-3’  R: 5’-GAGTTATCCCTTGCCTATCC-3’ |
| MMP-2 | F 5’-GCTGGCTGCCTTAGAACCTTTC-3’  R 5’-GAACCATCACTATGTGGGCTGAGA-3’ |
| MMP-11 | F 5’-CAACATACCTCAATCCTGTCCC-3’  R 5’-CAATGGCTTTGGAGGATAGC-3’ |
| MMP-14 | F 5’-GAGCTCAGGGCAGTGGATAG-3’  R 5’-GGTAGCCCGGTTCTACCTTC-3’ |
| MMP-17 | F 5’-ACTCATGTACTACGCCCTCA-3’  R 5’-GAGAAGTCGATCTGGATGTC-3’ |
| MMP-19 | F 5’-GGGTCCTGTTCTTCCTACAT-3’  R 5’-CAATCCTGCAGTACTGGTCT-3’ |

*Hegedus L, Cho H, Xie X, Eliceiri GL. Additional MDA-MB-231 breast cancer cell matrix metalloproteinases promote invasiveness. J Cell Physiol. 2008;216:480-5.
